# Supplementary material
Source: publisher figshare collection journal article supplement (https://karger.figshare.com/articles/dataset/_/5977303)
Supplement: Supplementary file 1 [file 1]

Table S2. Abbreviations of features identified on chimpanzee brains (sulci unless otherwise stated). After Connolly [1950].

|                       |                                                          |
|-----------------------|----------------------------------------------------------|
| <i>1</i>              | exposed portion of first annectant gyrus (of Gratiolet)  |
| <i>2</i>              | exposed portion of second annectant gyrus (of Gratiolet) |
| <i>a</i> <sup>1</sup> | anterior (superior parallel) ramus of <i>ts</i>          |
| <i>a</i> <sup>2</sup> | middle (angularis) ramus of <i>ts</i>                    |
| <i>a</i> <sup>3</sup> | descending (anterior occipital) ramus of <i>ts</i>       |
| <i>b</i>              | primitive form of <i>oci</i> (sublunate)                 |
| <i>C</i>              | central fissure (of Rolando)                             |
| <i>cm</i>             | callosomarginal                                          |
| <i>d</i>              | diagonal                                                 |
| <i>e</i>              | processus acuminis of <i>ip</i>                          |
| <i>fi</i>             | inferior frontal                                         |
| <i>fm</i>             | middle frontal                                           |
| <i>fo</i>             | fronto-orbital                                           |
| <i>fs</i>             | superior frontal                                         |
| <i>h</i>              | horizontal ramus of <i>pci</i>                           |
| <i>io</i>             | incisura opercularis                                     |
| <i>ip</i>             | intraparietal                                            |
| <i>L</i>              | lunate (Affenspalte)                                     |
| <i>lc</i>             | lateral calcarine                                        |
| <i>o</i>              | orbital                                                  |
| <i>oci</i>            | inferior occipital                                       |
| <i>ol</i>             | olfactorius                                              |
| <i>otr</i>            | transverse occipital                                     |
| <i>pci</i>            | inferior precentral                                      |
| <i>pcm</i>            | middle precentral                                        |
| <i>pcs</i>            | superior precentral                                      |
| <i>pl</i>             | prelunate                                                |
| <i>pm</i>             | paramedial                                               |
| <i>po</i>             | parieto-occipital                                        |
| <i>ps</i>             | superior parietal                                        |
| <i>pti</i>            | inferior postcentral                                     |
| <i>ptl</i>            | postlunate                                               |
| <i>pts</i>            | superior postcentral                                     |
| <i>r</i>              | rectus (principal)                                       |
| <i>rc</i>             | retrocalcarine                                           |
| <i>S</i>              | Sylvian fissure                                          |
| <i>sca</i>            | subcentral anterior                                      |
| <i>scp</i>            | subcentral posterior                                     |
| <i>tm</i>             | middle temporal                                          |
| <i>ts</i>             | superior temporal (parallel)                             |
| <i>u</i>              | superior ramus of <i>lc</i>                              |
| <i>W</i>              | fronto-marginal (of Wernicke)                            |
