# Supplementary material
Source: publisher figshare collection journal article supplement (https://karger.figshare.com/articles/dataset/_/5977303)
Supplement: Supplementary file 2 [file 1]

Table S1. Chimpanzees used in study.\*

| Chimpanzee | Sex | Age (yrs) | Brain vol (cm3) |
|------------|-----|-----------|-----------------|
| Abby       | F   | 13        | 482.0           |
| Callie     | F   | 15        | 422.0           |
| Evelyne    | F   | 15        | 434.0           |
| Iyk        | M   | 44        | 441.0           |
| J. Carter  | M   | 24        | 393.0           |
| Joseph     | M   | 27        | 452.0           |
| Laz        | M   | 20        | 484.0           |
| Lulu       | F   | 44        | 401.0           |

\*Brain volume includes gray matter, white matter, cerebrospinal fluid, cerebellum, and brain stem.
